# Supplementary material
Source: publisher site journal article supplement (https://static.cambridge.org/content/id/urn:cambridge.org:id:article:S0899823X20004225/resource/name/S0899823X20004225supp002.docx)
Supplement: Supplementary file 1 [file S0899823X20004225supp002.docx]

**Appendix A.** Change in conditions of interest among Minimum Data Set 3.0 assessments showing 1-day antibiotic use, comparing 2012 vs. 2016,** adjusted for seasonality (calendar month) and NH cluster standard errors.

|  | All *(regardless of cognitive status)* | All ADRD  *(n=* *1,243,779)* | ADRD with ACI  *(n=* *286,066)* | ADRD without ACI  *(n=* *957,783)* |
| --- | --- | --- | --- | --- |

|  | AOR | 95% CI | | | AOR | 95% CI | | | | AOR | | 95% CI | | | AOR | | 95% CI | |
| --- | --- | --- | --- | --- | --- | --- | --- | --- | --- | --- | --- | --- | --- | --- | --- | --- | --- | --- |
| UTI | 0.56* | 0.53 | 0.59 | 0.53* | | | 0.48 | 0.59 | 0.58* | | 0.54 | | 0.61 | 0.59* | | 0.55 | | 0.63 |
| No Infection | 1.44* | 1.37 | 1.50 | 1.07* | | | 1.02 | 1.11 | 1.18* | | 1.15 | | 1.21 | 1.15* | | 1.12 | | 1.18 |
| Any Infection, Except UTI | 0.99 | 0.92 | 1.06 | 0.89 | | | 0.79 | 1.00 | 0.98 | | 0.91 | | 1.06 | 1.01 | | 0.92 | | 1.09 |

Note: *Statistically significant at alpha = .05; **Represents a 10% random sample of CMS-certified U.S. NHs’ quarterly and annual assessments, 2012 includes April 1st 2012- December 31st 2012 and 2016 includes January 1st 2016 -November 30th 2016 as per consistently defined variables and data availability. AOR, Adjusted Odds Ratio; CI: Confidence Interval; “All” represents all quarterly and annual resident assessments; ADRD, Alzheimer's Disease or Related Dementia; ACI, advanced cognitive impairment; UTI, urinary tract infection.

**Appendix B.** Proportion of Minimum Data Set 3.0 assessments recording conditions of interest among those with 1-day antibiotic use, comparing 2012 vs. 2016,* adjusted for seasonality (calendar month) and NH cluster standard errors.


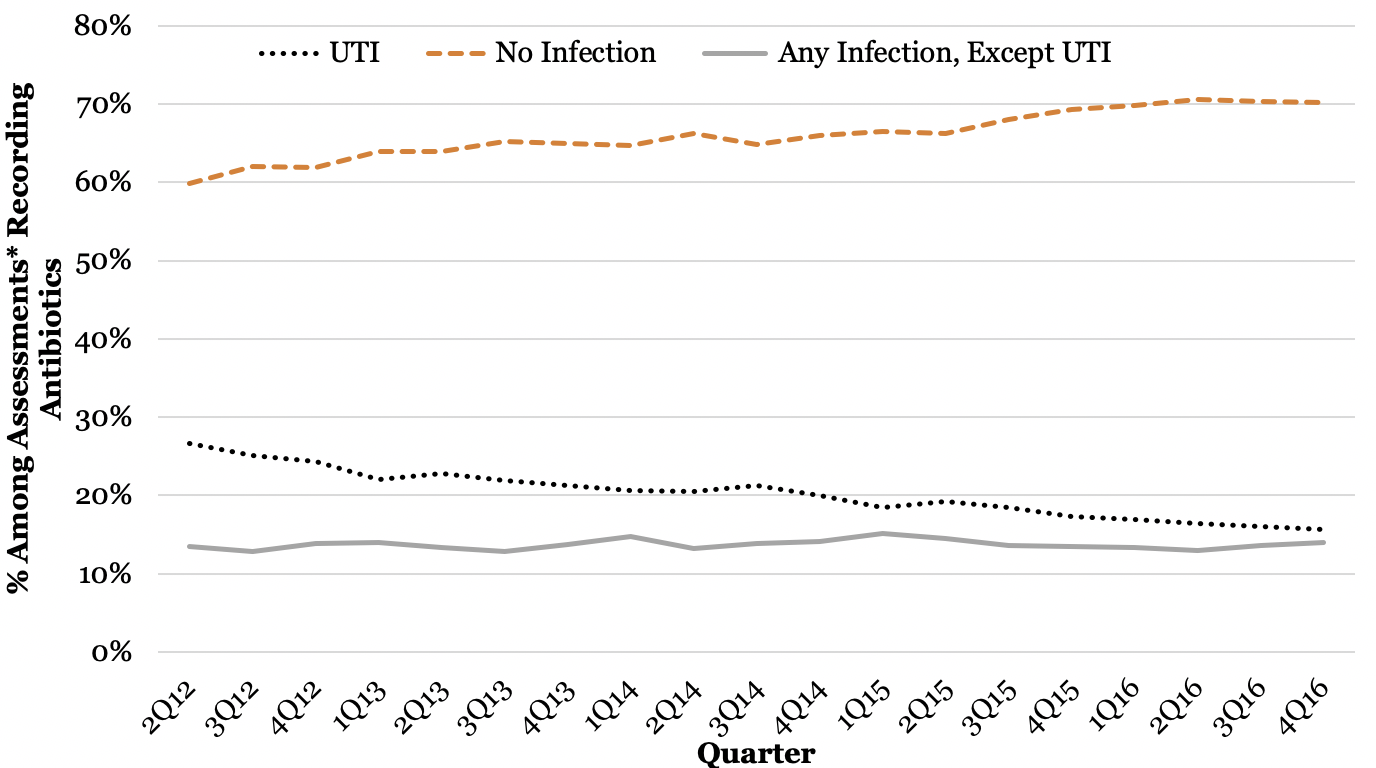


Note: *Represents a 10% random sample of CMS-certified U.S. NHs’ quarterly and annual assessments, 2012 includes April 1st 2012- December 31st 2012 and 2016 includes January 1st 2016 -November 30th 2016 as per consistently defined variables and data availability. UTI, urinary tract infection.
